# Supplementary material
Source: PubMed Central journal article supplement (PMC3501013)
Supplement: supp_M112.404061_jbc.M112.404061-1.pdf [file supp_M112.404061_jbc.M112.404061-1.pdf]

**Table S1. Primers used for ChIP analysis of the human *Tissue Factor* promoter**

| <b>REGION No.</b> | <b>REGION in the human TF promoter</b> | <b>Primers</b>                                                                                  | <b>Size (bp)</b> |
|-------------------|----------------------------------------|-------------------------------------------------------------------------------------------------|------------------|
| R1                | -235 to +180                           | F: 5'- TCG GTG GCG CGG TTG AAT CAC TGG -3'<br>R: 5'- GTC CGA GCG ACG GCG GTC TC -3'             | 415              |
| R2                | -666 to -235                           | F: 5'- ACC GGC ATT CCC ACC GCC -3'<br>R: 5'- GAG CTG CCC TGG AGG ACG CAG -3'                    | 426              |
| R3                | -1118 to -666                          | F: 5'- TTC TCC AGT CGT GTC TTG CAG GC -3'<br>R: 5'- CAG CCA CGG TGT GAC CGG CTC -3'             | 450              |
| R4                | -1529 to -1118                         | F: 5'- TCA GCT ACC TTC AAT CCC AGA GAG C -3'<br>R: 5'- GCC TGC AAG ACA CGA CTG GAG AA -3'       | 434              |
| R5                | -1942 to -1529                         | F: 5'- CGC ACC GTC AAA AAG TAG ATC TGG CC -3'<br>R: 5'- GCT CTC TGG GAT TGA AGG TAG CTG AAG -3' | 438              |
| R3.1              | -666 to -877                           | F: 5'- CGG TGG AAC TCA GTC CCA CAG ATG TC -3'<br>R: 5'- CAG CCA CGG TGT GAC CGG CTC -3'         | 211              |
| R3.2              | -877 to -1118                          | F: 5'- TTC TCC AGT CGT GTC TTG CAG GC -3'<br>R: 5'- GTT CCA CCG AAA TGC AGA GGA ACC -3'         | 248              |
| R4.1              | -1118 to -1347                         | F: 5'- GTC TAC AAG GGC TAA ACC TGG ATG TGC -3'<br>R: 5'- GCC TGC AAG ACA CGA CTG GAG AA -3'     | 229              |
| R4.2              | -1347 to -1529                         | F: 5'- TCA GCT ACC TTC AAT CCC AGA GAG C -3'<br>R: 5'- CCC TTG TAG ACT TTC CTT CCT CGA AGC -3'  | 216              |

**Table S2. Primers used for ChIP analysis of the human *Tissue Factor pathway inhibitor* promoter**

| <b>REGION No.</b> | <b>REGION in the human TFPI promoter</b> | <b>Primers</b>                                                         | <b>Size (bp)</b> |
|-------------------|------------------------------------------|------------------------------------------------------------------------|------------------|
| R1                | -370 to +25                              | F: 5'-TCACTAAGAGAGACCTCCAACGGT-3'<br>R: 5'-TCAGAGATCACTGGCAGTTGGGAA-3' | 395              |
| R2                | -798 to -378                             | F: 5'-CCTGGCAAAGTAGATTCTGCCCAT-3'<br>R: 5'-TGTCAGGCTTTGAGCCCTACCTTA-3' | 400              |
| R3                | -1198 to -798                            | F: 5'-GCAGGGCATGAGGTAATAGGAGAT-3'<br>R: 5'-AGGAAGGCTGAAGACATTTGGTC-3'  | 400              |
| R4                | -1653 to -1256                           | F: 5'-ATCACTCGCGGTTAGGAGCTGGA-3'<br>R: 5'-CTTGGTACCACCATGGACCTTGA-3'   | 397              |

**Table S3. Primers used for binding analysis of the indicated transcription factors by EMSA to the human Tissue Factor promoter.**

| <b>Transcription Factor</b> | <b>Binding site</b> | <b>Primer name</b> | <b>Sequence</b>                           |
|-----------------------------|---------------------|--------------------|-------------------------------------------|
| TCF-4E                      | A                   | WT_s               | 5'-CCCAGAGAGCAAAGAATCACAT-3'              |
|                             |                     | WT_as              | 5'-ATGTGATTCTTTGCTCTCTGGG-3'              |
|                             | B                   | WT_s               | 5'-AGTTTACAGCAAAGCCCAGAA-3'               |
|                             |                     | WT_as              | 5'-TTCTGGGCTTTGCTGTAAACT-3'               |
| GATA-1                      | A                   | WT_s               | 5'-AGCTAAACGAGATATGTATATA-3'              |
|                             |                     | WT_as              | 5'-TATATACATATCTCGTTTAGCT-3'              |
|                             | B                   | WT_s               | 5'-AATGACAGGAGATACTTTGACA-3'              |
|                             |                     | WT_as              | 5'-TGTCAAAGTATCTCCTGTCATT-3'              |
| TFII-I                      | A                   | WT_s               | 5'-CTTTCTGCTTCGAGGAAGGAAAGTCTACAAGGGCT-3' |
|                             |                     | WT_as              | 5'-AGCCCTTGTAGACTTTCCTTCCTCGAAGCAGAAAG-3' |
|                             | B                   | WT_s               | 5'-AAAACGTGGGAAAGAAGGAGAG-3'              |
|                             |                     | WT_as              | 5'-CTCTCCTTCTTTCCCACGTTTT-3'              |
| PXR:RXRalpha                | A                   | WT_s               | 5'-GTGCTATTTTCAGTTCAGGCAAAGG -3'          |
|                             |                     | WT_as              | 5'-CCTTTGCCTGAACTGAAATAGCAC-3'            |
| c-ETS-1                     | A                   | WT_s               | 5'-CTTTCTGCTTCGAGGAAGGAAAGTCTACAAGGGCT-3' |
|                             |                     | WT_as              | 5'-AGCCCTTGTAGACTTTCCTTCCTCGAAGCAGAAAG-3' |
| AP-1/c-Jun                  | A                   | WT_s               | 5'-GGGAAAATGACTCAGGCTAGA-3'               |
|                             |                     | WT_as              | 5'-TCTAGCCTGAGTCATTTTCCC-3'               |
| AP-1/c-Jun                  | A                   | MUT_s              | 5'-GGGAAAACAGTCTGGGCTAGA-3'               |
|                             |                     | MUT_as             | 5'-TCTAGCCCAGACTGTTTTTCCC-3'              |
